1 **Title:** Co-circulating pathogens of humans: A systematic review of mechanistic transmission  
2 models

3

4 **Authors:** KE Shaw\*, JK Peterson, N Jalali, S Ratnavale, M Alkuzweny, C Barbera, A Costello,  
5 LT Emerick, GF España, AS Meyer, S Mowry, M Poterek, C de Souza Moreira, Eric Morgan, S  
6 Moore, TA Perkins<sup>+</sup>

7

8 **Affiliations:** University of Notre Dame, South Bend, Indiana USA

9 \*Corresponding author: [kshaw7@nd.edu](mailto:kshaw7@nd.edu)

10 + Corresponding author: [taperkins@nd.edu](mailto:taperkins@nd.edu)

11

## 12 **Acknowledgements**

13 This work was supported by the NIH National Institute of General Medical Sciences R35 MIRA  
14 program to T.A.P. (grant no. R35GM143029).

15

## 16 **Co-circulating pathogens of humans: A systematic review of mechanistic transmission** 17 **models**

18

### 19 **Abstract**

20 Historically, most mathematical models of infectious disease dynamics have focused on a single  
21 pathogen, despite the ubiquity of co-circulating pathogens in the real world. We conducted a  
22 systematic review of 311 published papers that included a mechanistic, population-level model  
23 of co-circulating human pathogens. We identified the types of pathogens represented in this  
24 literature, techniques used, and motivations for conducting these studies. We also created a  
25 complexity index to quantify the degree to which co-circulating pathogen models diverged from  
26 single-pathogen models. We found that the emergence of new pathogens, such as HIV and  
27 SARS-CoV-2, precipitated modeling activity of the emerging pathogen with established  
28 pathogens. Pathogen characteristics also tended to drive modeling activity; for example, HIV  
29 suppresses the immune response, eliciting interesting dynamics when it is modeled with other  
30 pathogens. The motivations driving these studies were varied but could be divided into two  
31 major categories: exploration of dynamics and evaluation of interventions. Finally, we found that  
32 model complexity quickly increases as additional pathogens are added. Future potential avenues  
33 of research we identified include investigating the effects of misdiagnosis of clinically similar  
34 co-circulating pathogens and characterizing the impacts of one pathogen on public health  
35 resources available to curtail the spread of other pathogens.

36

### 37 **1. Introduction**

38 Mathematical modelling is a powerful tool in understanding and forecasting infectious diseases  
39 and shaping public health responses (Ferguson et al. 2006, Heesterbeek et al. 2015, Pagel and  
40 Yates 2022). Mathematical models allow researchers to investigate the population-level impact  
41 of different treatment regimens for infectious diseases (Abu-Raddad et al. 2009), analyze the  
42 effect of nonpharmaceutical interventions on disease spread (Cowger et al. 2022), and predict  
43 how factors such as climate change will influence transmission of vector-borne diseases  
44 (Lafferty 2009, Eikenberry and Gumel 2018, Mordecai et al. 2019). However, the majority of  
45 infectious disease models focus on a single pathogen, despite the fact that multiple pathogens are  
46 co-circulating in any given time and place (Tsai et al. 2017, Mendenhall et al. 2022).

47

48 Co-circulating pathogens have the potential to impact the dynamics of one another via multiple  
49 mechanisms. People infected with HIV, for example, are more susceptible to infection by other  
50 pathogens, and this individual-level phenomenon can have population-level effects on  
51 transmission dynamics (Galvin and Cohen 2004, Mayer et al. 2007). HIV, TB, and malaria in  
52 particular co-circulate widely in under-resourced settings and can exacerbate both the clinical  
53 presentation and transmission of one another (Vitoria et al. 2009). This can lead to more  
54 interventions necessary at the individual-patient level, as well as a greater population-level  
55 burden of disease (Alemu et al. 2013, Montales et al. 2015). Furthermore, environmental factors  
56 such as climate change and land use changes likely impact multiple pathogens simultaneously  
57 and potentially synergistically, which could not be captured with a single-pathogen focus.  
58 Deforestation and the expansion of agriculture, for example, have been shown to shift the  
59 abundance, diversity, and biting rates of mosquito species that are known arbovirus vectors  
60 (Zahouli et al. 2017, Da Silva Pessoa Vieira et al. 2022).

61

62 Shifting public health priorities in response to new threats can also have unintended effects on  
63 co-circulating pathogens. For example, during the height of the COVID-19 pandemic, routine  
64 vaccination campaigns across the world against diseases such as measles and polio were  
65 disrupted, with ripple effects on vaccine coverage and transmission dynamics (Gaythorpe et al.  
66 2021, Cardoso Pinto et al. 2022, Bigouette et al. 2022). In addition, co-circulating pathogens  
67 with similar clinical presentations, such as Zika, dengue, and chikungunya, may hinder  
68 surveillance efforts to discern the true prevalence of each pathogen contributing to the observed  
69 syndromic data due to misdiagnosis and also hampering targeted public health interventions  
70 (Oliveira et al. 2020, Oidtman et al. 2021, Ribas Freitas et al. 2024).

71  
72 Given the many ways in which co-circulating pathogens may impact each other, mathematical  
73 models that explicitly model these interactions may provide key insights. For example,  
74 researchers may be better able to capture transmission dynamics and thereby improve forecasting  
75 accuracy by including synergistic interactions such as one pathogen increasing host susceptibility  
76 to other pathogens (Marimuthu et al. 2020), or mitigating interactions such as infection causing  
77 decreases in host mobility, thus decreasing host exposure to other co-circulating pathogens  
78 (Rohani et al. 2003). The presence of co-circulating pathogens in a population may necessitate  
79 different screening or treatment regimens to achieve public health goals, and mathematical  
80 models can aide in exploring these different scenarios (Macgregor et al. 2020, Rao et al. 2022).  
81 The myriad possibilities in these approaches motivated us to explore the current state of the  
82 literature on mathematical models of co-circulating pathogens.

83  
84 Despite the evidence for the impact of co-circulating pathogens on each other and the potential  
85 usefulness of mathematical models, we did not find any systematic reviews of mathematical  
86 models of co-circulating pathogens in our literature search. Therefore, we conducted this  
87 systematic review with the goal of characterizing the existing scientific literature on co-  
88 circulating pathogen models, to both better understand the current state of this field and identify  
89 knowledge gaps that need to be addressed. Specifically, our objectives were:

- 90 i. To determine the most common pathogens modeled together and the ecological,  
91 biological, and clinical similarities between these pathogens,
- 92 ii. To analyze the authors' motivations for creating co-circulation models and the  
93 intended purpose of their studies,
- 94 iii. To characterize common features of co-circulation models and their outputs,
- 95 iv. To quantify differences between single-pathogen and co-circulating pathogen models,  
96 and
- 97 v. To report aspects of co-circulation models that are uncommon in the literature and  
98 potentially fruitful avenues for future research.

99

100

## 101 **2. Methods**

### 102 *2.1 Literature search*

103 On October 21<sup>st</sup>, 2022 we searched Google Scholar, Pubmed, and Web of Knowledge databases  
104 using a set of keywords. Our keyword list consisted of: *co-circulating pathogen; concurrent*  
105 *epidemic; polymicrobial infection AND mathematical model; concurrent infection AND*  
106 *mathematical model; syndemic AND model; co-infection AND mathematical model;*  
107 *heterologous reactivity AND mathematical model; polyparasitism AND mathematical model;*

108 *synergistic pathogens AND mathematical model; dual infection AND mathematical model;*  
109 *pathogen co-occurrence; co-epidemic; superinfection AND mathematical model.* We retrieved a  
110 total of 1,908 unique bibliographic records from Google Scholar, PubMed, and Web of Science,  
111 which we reviewed in a four-stage process. In stage one, the titles and abstracts of the resulting  
112 manuscripts were briefly scanned for the inclusion criteria, which yielded a total of 343 papers  
113 published between 1985 and 2023 (1,565 excluded). In stage two, the references of each selected  
114 paper were then scanned to find additional publications, which yielded an additional 206 papers.  
115 Additionally, any newly published and relevant paper that the authors became aware of during  
116 the review process were added (five papers total). In stage three, a pair of reviewers assessed  
117 each paper (N=554) for meeting our inclusion criteria (below) and reached a consensus. In stage  
118 four, the reviewers first extracted the data separately and then later compared their questionnaire  
119 answers to reach a consensus on each question. We excluded papers not published in English  
120 (Figure 1).

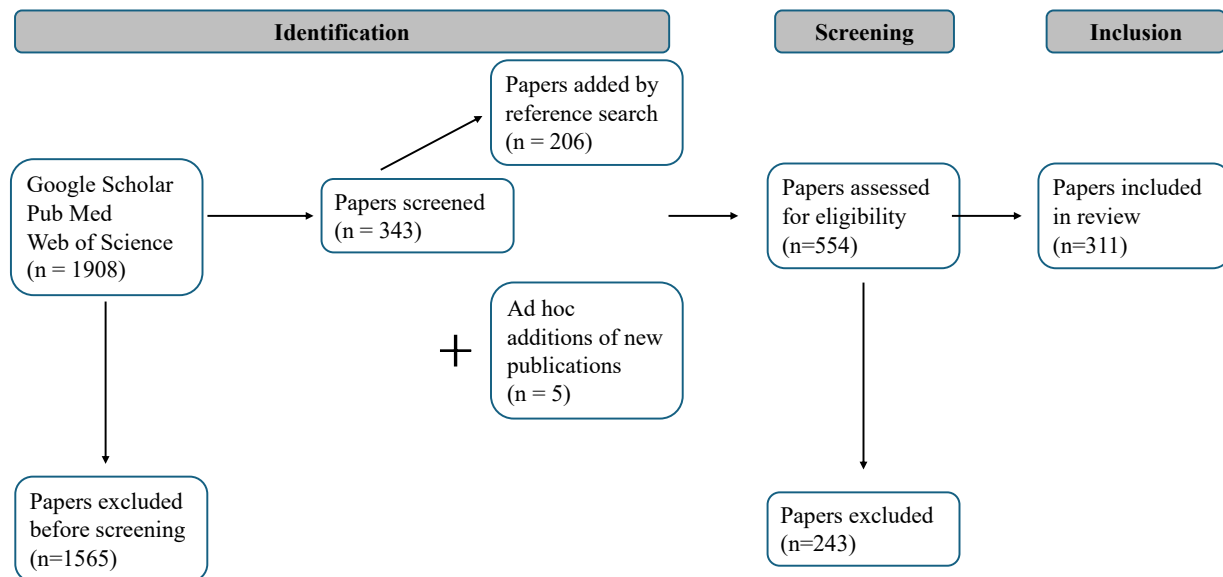

121  
122 **Figure 1.** PRISMA flowchart for the literature search, screening, and inclusion process.  
123  
124

## 125 2.2 Eligibility criteria

126 All 554 papers were evaluated for inclusion based on six questions:

- 127 (i) Is the paper an original research article?
- 128 (ii) Are at least two real pathogen species (not theoretical) modeled in the same model?
- 129 (iii) Does at least one of the pathogens modeled cause human disease?
- 130 (iv) Does the model have at least one population-level aspect in a human population?
- 131 (v) Is some part of the model structure informed by a mechanistic derivation of biological  
132 processes as opposed to purely involving phenomenological relationships?

133 (vi) Is there a place in the model where hosts transition from a susceptible to an exposed  
134 or infected state?  
135

136 We narrowed the scope of this review to real pathogen species that cause human disease (criteria  
137 ii and iii) because co-circulating pathogens have been a salient topic in the non-human literature  
138 for a longer period, and we were interested in how that has percolated into the modeling of  
139 human disease. We focused on mechanistic, population-level models that include a transmission  
140 process (criteria iv-vi) in contrast to descriptive or statistical models that fit data without any  
141 consideration of the biological mechanisms involved. We included papers for which the answer  
142 to all six questions was “yes”.  
143

### 144 *2.3 Questionnaire development*

145 We used a questionnaire to screen each publication in order to standardize the data generated  
146 from each review. We developed the questionnaire through a collaborative, iterative three-stage  
147 process. In the first stage of the development process, our aim was to evaluate the ability of the  
148 questionnaire to elicit similar responses from multiple reviewers assessing the same paper. To  
149 this end, reviewers used the questionnaire to review the same paper, and we then evaluated  
150 response data for discrepancies. Through group discussion, we identified areas of improvement  
151 through group discussion, and feedback from the group was applied to the next iteration of the  
152 questionnaire. We carried out this process twice. Finally, in the third round of evaluation all  
153 papers were reviewed in pairs as described below and the data generated were used for analysis.  
154 All reviewers were in communication throughout the review stage to harmonize any  
155 discrepancies that arose.  
156

### 157 *2.4 Paper review process*

158 Two reviewers were randomly assigned to each publication, which they reviewed using the  
159 standardized questionnaire. After reviewing each paper individually, the pair of reviewers  
160 assigned to each paper then met to compare and discuss answers and resolve any discrepancies  
161 between answers. Each pair then submitted a final version of their answers in the form of a third  
162 survey marked ‘consensus.’ Only consensus surveys were analyzed (N=311).

### 163 164 *2.5 Questionnaire description*

165 The questionnaire consisted of six sections: (i) bibliographic information; (ii) inclusion criteria;  
166 (iii) basic information about each parasite modeled; (iv) model details; (v) model outputs; and  
167 (vi) motivation for selecting the pathogens modeled. The final version of the questionnaire  
168 contained 47 questions.  
169

### 170 *2.6 Author motivations*

171 Question 39 of our systematic survey was an open-response question: “Did the authors develop  
172 their model to answer a specific research question or to achieve a specific purpose or objective?”  
173 To analyze the responses to this question, we inserted the pooled responses to this question and  
174 into ChatGPT version 3.5 (“ChatGPT” 2024) with the prompt “The text I provided you was  
175 supposed to illustrate authors’ motivations to write the papers we analyzed. From that text, what  
176 would you say are the main motivations of authors?” Authors KS and TAP then discussed the  
177 output from ChatGPT and refined the language of the motivations ChatGPT produced to create

178 four categories of motivations, and KS categorized each response to question 39 according to  
179 these motivations. Each response could receive more than one categorization.

180

## 181 *2.7 Bibliometrics*

182 To explore how journal prestige and topic may be related to citation patterns, for all papers  
183 included in our review for which a DOI was available, we queried Unpaywall (Richard Orr,  
184 Heather Piwowar, Jason Priem 2024) and OpenAlex (Aria et al. 2024) to collect the times each  
185 paper has been cited as well as the h-index and i-10index for the journal in which each paper was  
186 published, as of March 11<sup>th</sup>, 2024. We then used the glmmTMB package in R (Brooks et al.  
187 2017) to create generalized linear models to assess potential associations between citation count  
188 and publication year, journal h-index, and journal i-10index. We also used the Web of Science  
189 API Lite (“Web of Science API” 2024) to collect subject categories for each paper. We then  
190 binned related categories such as “Mathematics, Applied” and “Mathematics” to create seven  
191 meta-categories. We created a second generalized linear model to test for the impact of assigned  
192 meta-category on citation counts.

193

## 194 *2.8 Complexity Index*

195 To estimate the extent to which each co-circulating pathogen model in our data set diverged from  
196 a single-pathogen model, we designed a complexity index derived from the responses to  
197 questions 23-30 in the questionnaire. The index was calculated by assigning one point to each  
198 answer that indicated a divergence from a single-pathogen model and then totaling the points.  
199 For example, question 23 (“Does the model structure include hosts that are co-infected with two  
200 or more pathogens?”) would have yielded one point for a “yes” answer and zero points for a  
201 “no.” For multi-part questions such as question 23f (“Which parameter values for the co-infected  
202 class are different from the mono-infected and uninfected classes? [select all that apply]”), we  
203 assigned one point for each parameter value selected. The maximum possible complexity index  
204 score was 18. An example of how this index was calculated can be found in Table S1.

205

## 206 *2.9 Data availability*

207 A full version of the questionnaire can be found in the supplementary materials. All data were  
208 analyzed in R version 4.3.0 (R Core Team 2021), and raw files and code used for analysis as  
209 well as a supplementary file of all tables produced from the analysis are available at  
210 <https://figshare.com/s/2b268f5df8aed6acad3f>.

211

## 212 **3. Results**

### 213 *3.1 Study selection*

214 In our four-stage review process, we identified 554 papers to review for eligibility, 311 of which  
215 met our inclusion criteria (Figure 1). The most common reasons for paper exclusion were: (i) the  
216 study did not include two real pathogen species in the same model (67.1%, 163/243, question 7);  
217 (ii) there was no place in the model where hosts transitioned into an exposed or infected state  
218 (42.4%, 103/243, question 11); and (iii) the model did not have at least one population-level  
219 aspect (35.4%, 86/243, question 9). Some papers were excluded based on multiple criteria. The  
220 oldest papers that met our search criteria were from 1991, although the majority of relevant  
221 papers were published in 2008 or later (90.4%; 281/311, Figure 2).

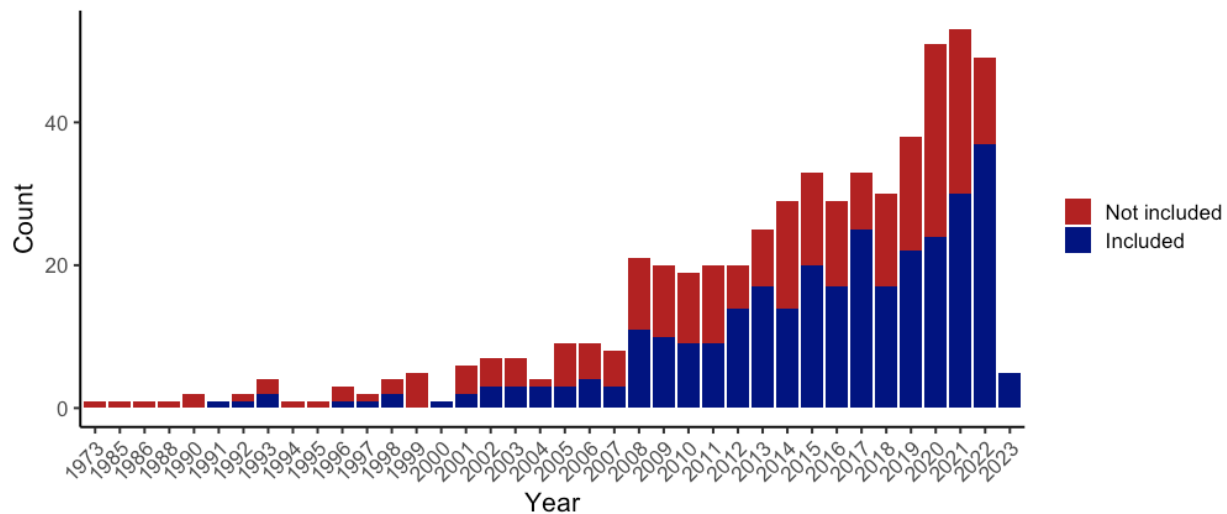

222  
223  
224  
225  
226  
227  
228

**Figure 2.** Temporal trends in the publication of co-circulating pathogen models. Papers that met our inclusion criteria gradually increased over time. The year of 2023 was only partially sampled up to papers published by the month of March.

### 3.2 Pathogen information

229  
230  
231  
232  
233  
234  
235  
236  
237  
238  
239  
240

The majority of included models considered two pathogens (88.4%, 275/311), while the maximum number of pathogens included in the same model was nine (0.32%, 1/311; Figure 3A). The most commonly modeled pathogen pairs were human immunodeficiency virus (HIV) and *Mycobacterium tuberculosis* (TB), representing 25% (78/311) of the models we reviewed. Other models that included more than two pathogens often were focused either on STIs (e.g., Korenromp et al. 2005, Kate K Orroth et al. 2007, Jenness et al. 2017) or vector-borne diseases such as dengue, chikungunya, and Zika that are transmitted by the same vector (e.g., Isea and Lonngren 2016, Okuneye et al. 2017). One model that included nine pathogens considered a panoply of common STIs: HIV, genital herpes, syphilis, chancroid, gonorrhea, chlamydia, trichomonas, bacterial vaginosis, and vaginal candidiasis (Johnson et al. 2011).

241  
242  
243  
244  
245  
246  
247  
248  
249  
250  
251  
252

To investigate which modes of transmission were included in the same models, we recorded all viable transmission modes for each pathogen; e.g., HIV would be recorded as both “sexually transmitted” and “other (vertical and bloodborne).” Therefore, when we calculated the percentage of each transmission mode in our data, the denominator was the total number of transmission modes recorded across all pathogens (988). Corresponding to the exceptionally high number of HIV-TB models, the most common transmission modes of pathogens were sexually transmitted (35.3%, 349/988), followed by a transmission mode of “other” (27%, 267/988) of which 65.5% (175/267) were recorded as vertical and bloodborne (Figure 3B). Respiratory transmission was the third most common transmission mode at 19% (188/988). We also found that the earliest papers in our data set tended to focus on sexually transmitted and respiratory pathogens, again reflecting the focus on HIV in combination with other STIs and with TB in the 1990s (Figure 3C). Over time, a greater diversity of transmission modes appeared, notably with

253 an increase in models of vector-borne diseases starting in 2008 and an increase in models with  
254 respiratory pathogens starting in 2020, coinciding with the SARS-CoV-2 pandemic.

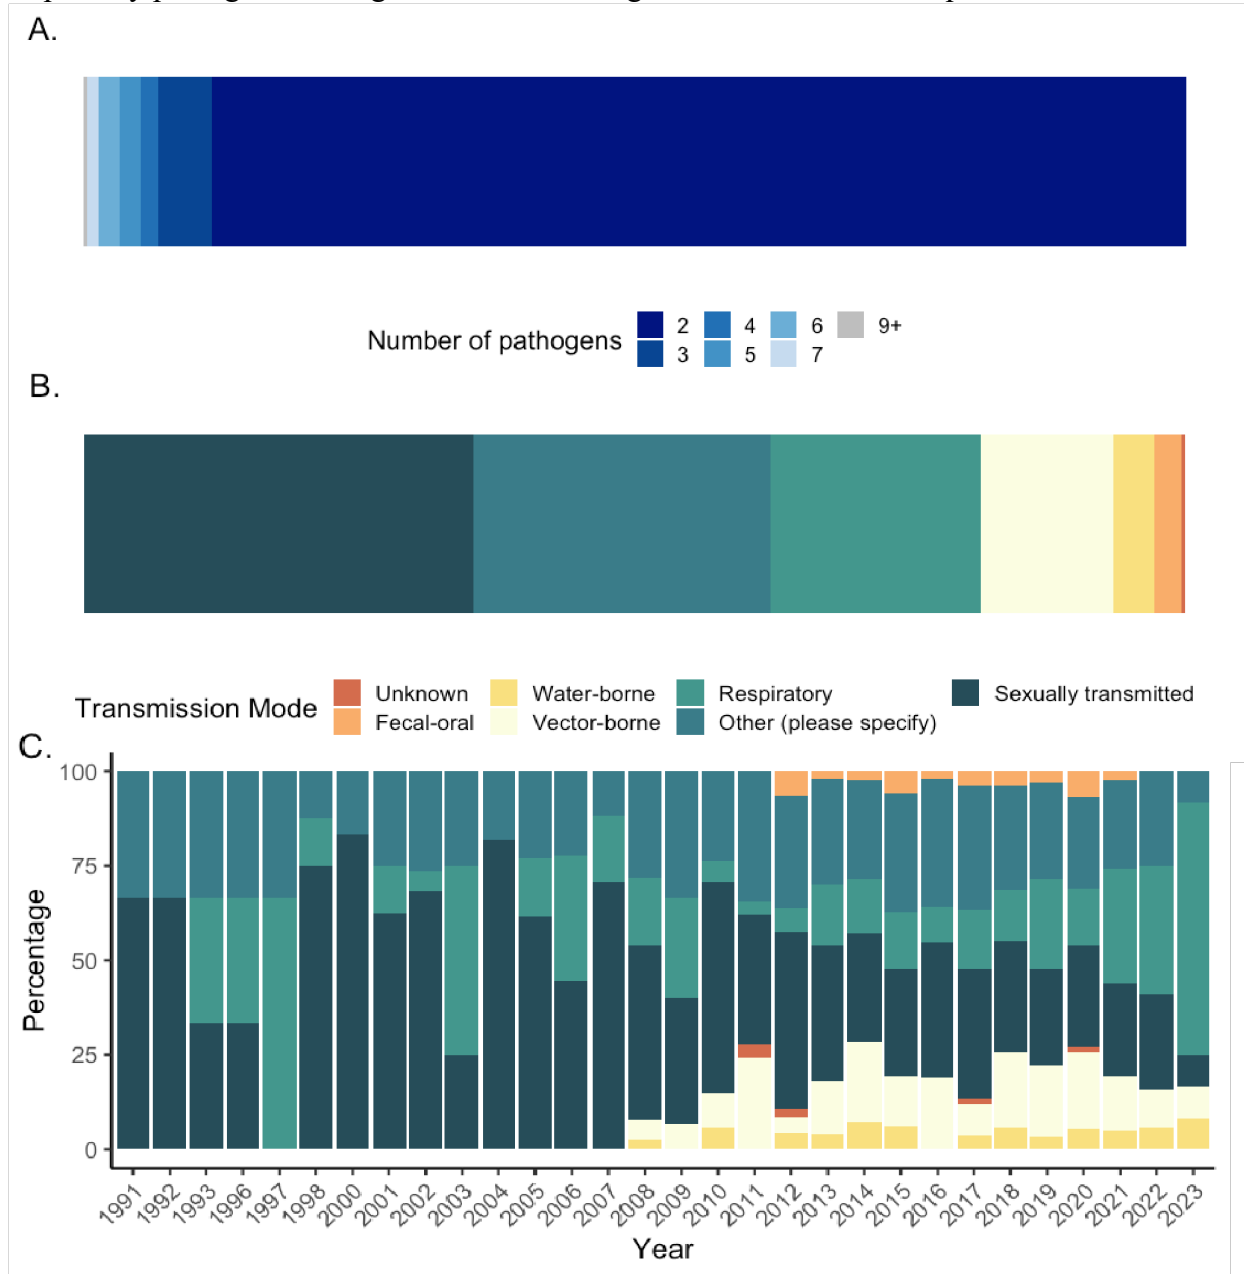

255  
256 **Figure 3.** Pathogen characteristics. **(A)** The frequency of how many pathogens were included in  
257 models. The vast majority of models included two pathogens. **(B)** Frequency of transmission  
258 modes represented across all models. Sexually transmitted pathogens and pathogens with “other”  
259 transmission routes such as bloodborne were common in our data set due to the large number of  
260 models focused on HIV. **(C)** Change in transmission modes represented in our data set over time,  
261 represented as a percentage of the total models we analyzed for that publication year. Vector-  
262 borne pathogens appear more frequently in the literature after 2008, and respiratory pathogens  
263 become more common starting in 2021. **(B)** and **(C)** share a legend.  
264



265 Beyond individual pathogens, we also investigated the frequency with which different pathogen  
266 taxa were modeled together. We categorized the taxonomic group and transmission mode for  
267 each pair of pathogens in our data set and counted the frequency of their co-occurrence in the  
268 same model (Figure 4). This analysis reflected all possible transmission routes for each pathogen  
269 and also all possible pairings within the same model. As such, a single paper could be  
270 represented multiple times based on the number of pathogens and transmission modes present,  
271 resulting in 957 distinct pathogen pairs. Sexually transmitted viruses with sexually transmitted  
272 bacteria (11.4%, 109/957) and sexually transmitted viruses with viruses with other transmission  
273 routes (11.3%, 108/957) occurred together most commonly, due to the high prevalence of STI-  
274 focused models in our review. Other common pairings were respiratory bacteria with sexually  
275 transmitted viruses (9.1%, 87/957) and respiratory bacteria with viruses with other transmission  
276 routes (9.2%, 88/957), due to the large number of HIV-TB models.

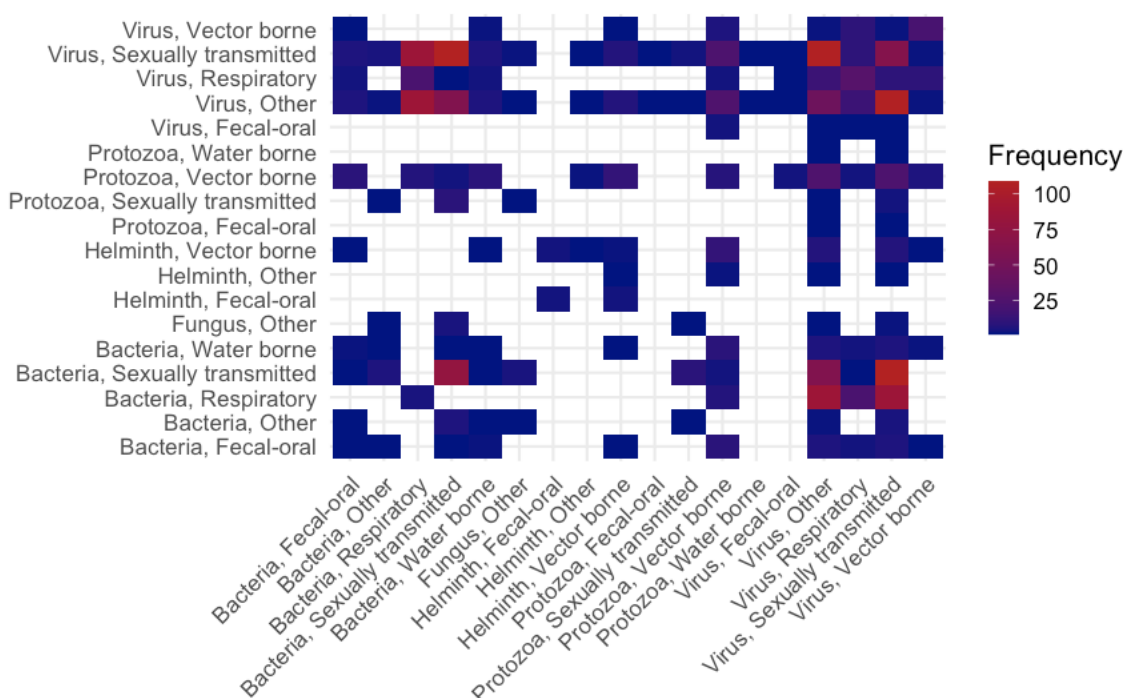

277  
278 **Figure 4.** Frequency of co-modelling pathogens within taxonomic groups and transmission  
279 modes. The most frequent pairings were sexually transmitted viruses with sexually transmitted  
280 bacteria and viruses with other transmission routes, followed by sexually transmitted viruses  
281 with respiratory bacteria (dominated by the prevalence of HIV-TB models in our data set).

282  
283 We found that the majority of pathogens modeled together did not share ecological similarities,  
284 as reported by authors (87.8%, 273/311, question 40). Of those that did, 63.2% (24/38) had  
285 shared seasonality and 39.5% (15/38) had shared environmental drivers of transmission. Shared  
286 seasonality was commonly noted for respiratory pathogens such as SARS-CoV-2, influenza, and  
287 RSV. Shared environmental drivers were noted for pathogens such as malaria and cholera, which  
288 are both sensitive to environmental conditions (e.g., rainfall) but via different mechanisms  
289 (Thomson et al. 2006, Lemaitre et al. 2019). Furthermore, pathogens that shared both seasonality  
290 and environmental drivers were noted for several models (9/38, 23.7%, Figure S1A). Multiple

291 ecological similarities were most often recorded for models of vector-borne pathogens with a  
292 shared vector taxa, such as the dengue, chikungunya, and Zika viruses.

293  
294 In contrast, a majority of pathogens modeled together did share at least one biological similarity  
295 (55.6%, 173/311, question 41), with 70.5% sharing a transmission route (122/173) and 63 %  
296 (109/173) sharing host subsets as the most common responses. Shared transmission routes were  
297 common in models with sexually-transmitted pathogens, vector-borne pathogens, and respiratory  
298 pathogens. Models with shared host subsets commonly included studies of intravenous drug  
299 users (de Vos et al. 2012, Vickerman et al. 2012, Zelenev et al. 2018) and childhood diseases  
300 (Rohani et al. 2003, Huang and Rohani 2006). Clinical or epidemiological similarities were  
301 shared by 62.7% (195/311, question 42) of pathogens modeled together, with the most common  
302 similarity being that treatments existed for both pathogens (59%, 115/195), due to large number  
303 of HIV-TB and STI models for treatable pathogens.

### 304 305 *3.3 Motivations and purpose*

306  
307 Reviewers identified two main scholarly motivators (question 45): 1) prior research suggested an  
308 effect of one pathogen on another but more research is needed (54.7%, 170/311), and 2) few or  
309 no prior modeling studies conducted of these two pathogens together (35.1%, 109/311). No clear  
310 scholarly motivation was noted in 11.6% (36/311) of papers.

311  
312 In addition, we used ChatGPT (version 3.5) (“ChatGPT” 2024) to summarize common themes in  
313 the reviewers’ answers to the open-ended question 39, “Did the authors develop their model to  
314 answer a specific research question or to achieve a specific purpose or objective?” (Box 1). We  
315 then refined the results from ChatGPT to better reflect the nuances we felt existed in our data set,  
316 resulting in four categories of author motivation. We then classified reviewer responses to  
317 question 39 according to the four motivation categories, allowing for more than one category to  
318 apply to each paper. The categories that resulted from this process were:

- 319 (i) **Understanding the dynamics of co-circulating pathogens**, in particular how  
320 multiple pathogens may alter the transmission patterns and/or population outcomes of  
321 one another. This category applied to papers in which the authors’ goals included  
322 evaluating quantitative outcomes such as  $R_0$ , disease burden, mortality, etc., and how  
323 outcomes differed in the presence of co-circulating pathogens.
- 324 (ii) **Developing mathematical models** for specific pairs of pathogens of interest, often  
325 due to the perceived novelty of doing so by the authors. While all papers in this  
326 review included a mathematical model, this category was for those that had a  
327 primarily mathematical focus or in which the authors only stated motivation for  
328 developing the model was that the pathogens had not been previously modeled  
329 together.
- 330 (iii) **Implementing interventions or control measures** for one pathogen and the resulting  
331 impact on it and/or other pathogens in the model. We placed papers in this category  
332 when the authors were investigating how interventions such as treatment, vaccination,  
333 or quarantining would impact co-circulating pathogens through either direct or  
334 indirect effects.
- 335 (iv) **Calculating cost-effectiveness and optimal control** of different treatment and  
336 control strategies. While there was some overlap with (iii), we created this category to

337 capture papers in which the authors were not necessarily investigating the impact of  
338 interventions on outcomes such as transmission or mortality, but in which they were  
339 primarily concerned with the best way to implement interventions given cost or labor  
340 constraints.

341  
342 Category (i), understanding disease dynamics, was the most common motivation for creating the  
343 models, with 52.3% (164/311) of papers falling into this category. Implementation of  
344 interventions (iii) was the second most common, at 35.4% (110/311), followed by cost-  
345 effectiveness (iv, 14.9%, 46/311) and developing mathematical models (ii, 13.8%, 43/311).  
346 Overlapping categorizations were common, in particular for categories (i) and (iii); Fig S2).  
347 Some papers fell into one or more of the four categories but also contained unique motivations  
348 and thus were counted in one or more of the four main categories and additionally as “other”  
349 (10%, 31/311). A small number, 1.6% (5/311), did not neatly fit into any of these categories and  
350 were categorized only as “other.” Examples of “other” author motivations include examining  
351 how one pathogen may exert indirect evolutionary pressures on another (Lloyd-Smith et al.  
352 2008), or what fundamentally allows for the co-existence of two co-circulating pathogens  
353 (Amaku et al. 2011).

354

**Box 1. Large language learning model analysis of survey question 39, “Did the authors develop their model to answer a specific research question or to achieve a specific purpose or objective?”**

We provided the reviewers’ answers to question 39 for all papers included in our review that met inclusion criteria and provided the prompt “The text I provided you was supposed to illustrate authors’ motivations to write the papers we analyzed. From that text, what would you say are the main motivations of authors?” The exact output created, prior to our modified version stated in the text, was as follows:

1. “Understanding Disease Dynamics: Authors aim to gain a deeper understanding of the dynamics of infectious diseases, including their transmission patterns, interactions between different pathogens, and the impact of interventions on disease spread.
2. Developing Mathematical Models: Many authors are motivated to develop mathematical models to simulate disease transmission, assess the effectiveness of intervention strategies, and predict the outcomes of various scenarios. These models allow researchers to study complex disease dynamics and inform public health decision-making.
3. Evaluating Intervention Strategies: There is a strong emphasis on evaluating the effectiveness and cost-effectiveness of intervention strategies, such as vaccination programs, treatment protocols, and preventive measures. Authors seek to identify optimal strategies for controlling disease spread and reducing disease burden in populations.”

355

356 *3.4 Bibliometrics*

357 We were able to source bibliometric data for 247 out of 311 of the papers in our analysis. The  
358 majority of these papers were cited fewer than 25 times (64.3%, 159/247, Figure 5). However,

359 there were some distinct outliers, with the most highly cited paper having 231 citations (Table 1).  
 360 Year of publication (z value = -7.721,  $p < 0.001$ ) and h-index (z value = 3.501,  $p = 0.0005$ ) of the  
 361 journal in which a paper was published were both significantly associated with citations, but the  
 362 effect sizes were minimal (central estimates of -0.0857 per year and 0.001653 per h-index unit,  
 363 respectively), suggesting that outliers in citations likely reflect papers that were particularly  
 364 useful or interesting to the field.

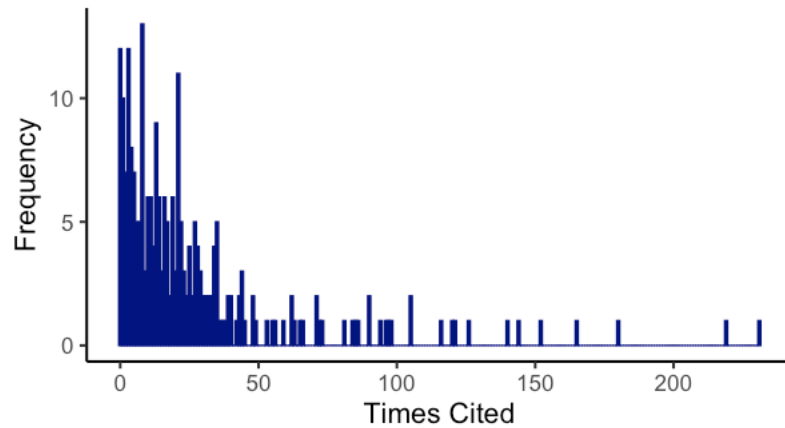

365 **Figure 5.** Frequency of citations. Most papers in our data set were cited fewer than 25 times,  
 366 however there were several outliers with over 100 citations.  
 367

368 **Table 1.** Top 10 cited papers from our data set.  
 369

| Title                                                                                                                                                  | Journal                                                | DOI                          | Times cited |
|--------------------------------------------------------------------------------------------------------------------------------------------------------|--------------------------------------------------------|------------------------------|-------------|
| Modelling the impact of global tuberculosis control strategies                                                                                         | <i>Proceedings of the National Academy of Sciences</i> | 10.1073/pnas.95.23.13881     | 231         |
| Genital herpes has played a more important role than any other sexually transmitted infection in driving HIV prevalence in Africa                      | <i>PLOS One</i>                                        | 10.1371/journal.pone.0002230 | 219         |
| Incidence of Gonorrhoea and Chlamydia following Human Immunodeficiency Virus preexposure prophylaxis among men who have sex with med: A modeling study | <i>Clinical Infectious Diseases</i>                    | 10.1093/cid/cix439           | 180         |
| Mathematical analysis of the transmission dynamics of HIV/TB coinfection in the presence of treatment                                                  | <i>Mathematical Biosciences and Engineering</i>        | 10.3934/mbe.2008.5.145       | 165         |
| Ecological interference between fatal diseases                                                                                                         | <i>Nature</i>                                          | 10.1038/nature01542          | 152         |

|                                                                                                                                                                                                   |                                                        |                              |     |
|---------------------------------------------------------------------------------------------------------------------------------------------------------------------------------------------------|--------------------------------------------------------|------------------------------|-----|
| Determinants of the impact of sexually transmitted infection treatment on prevention of HIV infection: A synthesis of evidence from the Mwanza, Rakai, and Masaka Intervention Trials             | <i>The Journal of Infectious Diseases</i>              | 10.1086/425274               | 144 |
| Comparing Dengue and Chikungunya emergence and endemic transmission in <i>A. aegypti</i> and <i>A. albopictus</i>                                                                                 | <i>Journal of Theoretical Biology</i>                  | 10.1016/j.jtbi.2014.04.033   | 140 |
| Identifying the interaction between influenza and pneumococcal pneumonia using incidence data                                                                                                     | <i>Science Translational Medicine</i>                  | 10.1126/scitranslmed.3005982 | 126 |
| Can Hepatitis C Virus (HCV) direct-acting antiviral treatment as prevention reverse the HCV epidemic among men who have sex with men in the United Kingdom? Epidemiological and modeling insights | <i>Clinical Infectious Diseases</i>                    | 10.1093/cid/ciw075           | 121 |
| Beneficial and perverse effects of isoniazid preventative therapy for latent tuberculosis infection in HIV-tuberculosis coinfecting populations                                                   | <i>Proceedings of the National Academy of Sciences</i> | 10.1073/pnas.0600349103      | 120 |

370  
371  
372 We found additional metadata for 244 of our 311 papers on the Web of Science search engine.  
373 This metadata provided subject categories for each paper, with one to five categorizations per  
374 paper. By binning related categories (for example, “Mathematics, Applied” and “Mathematics”;  
375 Table S2), we created seven main categories related to the research subject areas for each paper.  
376 Life sciences (54.1%, 132/311) and Mathematics (52.9%, 129/311) were the most common  
377 categories, while Operations and Management was the least common (3.3%, 8/311). Overlap  
378 between categories, in particular Mathematics and Life Sciences, was also common (Figure S3).  
379 Similar to citation year and journal h-index, we found that some categories were significantly  
380 associated with citations; again though, effect sizes (relative to Operations and Management)  
381 were minimal (Life Sciences: estimate = 0.639, z value = 3.207, p=0.00134; Medicine/Public  
382 health: estimate = 0.593, z value = 2.199, p=0.028; Multidisciplinary: estimate = 0.731, z value =  
383 3.015, p = 0.00257).

### 384 385 3.5 Model Characteristics and Outputs

386 The majority of publications presented deterministic models (89.7%, 279/311), followed by  
387 individual-based models (8.4%, 26/311). A very small number of papers contained a within-host  
388 model in addition to the population-level model required to meet our inclusion criteria (3.9%,

389 12/311). Spatially explicit models and metapopulation models were rare among the papers  
390 reviewed (0.64%, 2/311 and 0.32%, 1/311, respectively). Some papers contained multiple model  
391 components with varied structures, and thus fell into multiple categories (6.4%, 20/311).

392  
393 85.2% of the publications included models that were informed by data (265/311). Of these  
394 papers, 56.4% (149/265) used data extracted from the literature without giving further  
395 information on the origin of those data. Surveillance data were used in 29.1% (77/265) of papers,  
396 10.2% (27/265) used survey data, and 3% (8/265) used case study data. The most common use of  
397 data was for model parameterization (97%, 257/265), including the use of data-informed  
398 parameter values taken from other modelling studies. A smaller set of papers used data for model  
399 fitting or calibration (36.2%, 96/265).

400  
401 The most commonly reported model output (question 35) was disease prevalence (79.4%,  
402 248/311), followed by the reproduction number (59.5%, 185/311) and stability properties of the  
403 model (57.9%, 180/311). Several model outputs were not initially captured by our survey options  
404 and were coded as “other” (49.2%, 153/311). Among these, common responses we found in the  
405 “other” category were model sensitivity analysis, cost evaluation of different interventions, and  
406 total cases of disease averted by interventions. Outputs were commonly examined as a function  
407 of different interventions (question 36, 46.6%, 145/311), time (22.5%, 70/311), and varying  
408 parameter values (22.5%, 70/311). Rarely did models evaluate outputs as a function of  
409 seasonality (0.64%, 2/311), space (0.32%, 1/311), or temperature/climate (0.32%, 1/311).

### 410 411 *3.6 Complexity Index*

412  
413 We created a complexity index to quantify how much co-circulating pathogen models diverged  
414 from a set of independent, single-pathogen models. Scores were assigned based on questions 23-  
415 30, with one point for each increase in complexity (see Methods). The largest score on the  
416 complexity index we observed was 11, out of a maximum possible value of 18. Scores in the  
417 intermediate range of 4-7 were most common (72.7%; 226/311), with very few at the minimum  
418 score of 0 (2/311) or the maximum observed value of 11 (2/311; Figure 6A). This middle range  
419 of complexity reflected a pattern we commonly observed where most models aimed to  
420 investigate one or two dimensions of co-circulation/co-infection, but upon the incorporation of a  
421 second (or more) pathogen(s), the biology of the interplay between the pathogens often required  
422 multiple changes to the model relative to a single-pathogen model. The most commonly  
423 observed elements of the complexity index were including hosts that were co-infected (94.5%,  
424 294/311, question 23), including external factors that affect the transmission of both pathogens  
425 (e.g., interventions) (52.7%, 164/311, question 30), and allowing mono-infected hosts to have  
426 different levels of susceptibility to other pathogen(s) in the model as compared to uninfected  
427 hosts (52.4%, 163/311, question 24). The least commonly observed elements of the complexity  
428 index were accounting for interruptions or declines in services offered due to another co-  
429 circulating pathogen in the model structure (0.96%, 3/311, question 28) and the model structure  
430 including reporting or surveillance errors due to misdiagnosis between the pathogens modeled  
431 (1.3%, 4/311, question 26). Models that included within-host aspects of co-infection in the model  
432 structure were also rare (2.6%, 8/311, question 23a; Figure 6B).

433

434 Certain components of our complexity index were more likely to be included in the same model  
435 than others. Including co-infected hosts (question 23) and differing levels of susceptibility to  
436 other pathogens between uninfected and mono-infected hosts (question 24) were observed  
437 together more than any other pair of complexity score elements (51.5%, 160/311), as well as  
438 incorporating both co-infected hosts (question 23) and interventions (question 27) (48.9%,  
439 152/311) and incorporating co-infected hosts and external factors impacting transmission  
440 (question 30) (48.9%, 152/311) (Figure 6C). When looking at the correlation of different  
441 components (either jointly present or absent in a model), the most highly correlated pairs were  
442 likely due to question redundancy and dependency in our survey. For example, questions 23a,  
443 “Does the model structure explicitly include within-host pathogen-pathogen interaction?” and  
444 23b “What type of pathogen-pathogen interaction is represented?” are highly correlated ( $r=0.7$ ).  
445 Other than these types of related questions, there were few very strong correlations, either  
446 positive or negative, indicating high variation in which aspects of co-circulation models in our  
447 data set elaborated on (Figure 6D).

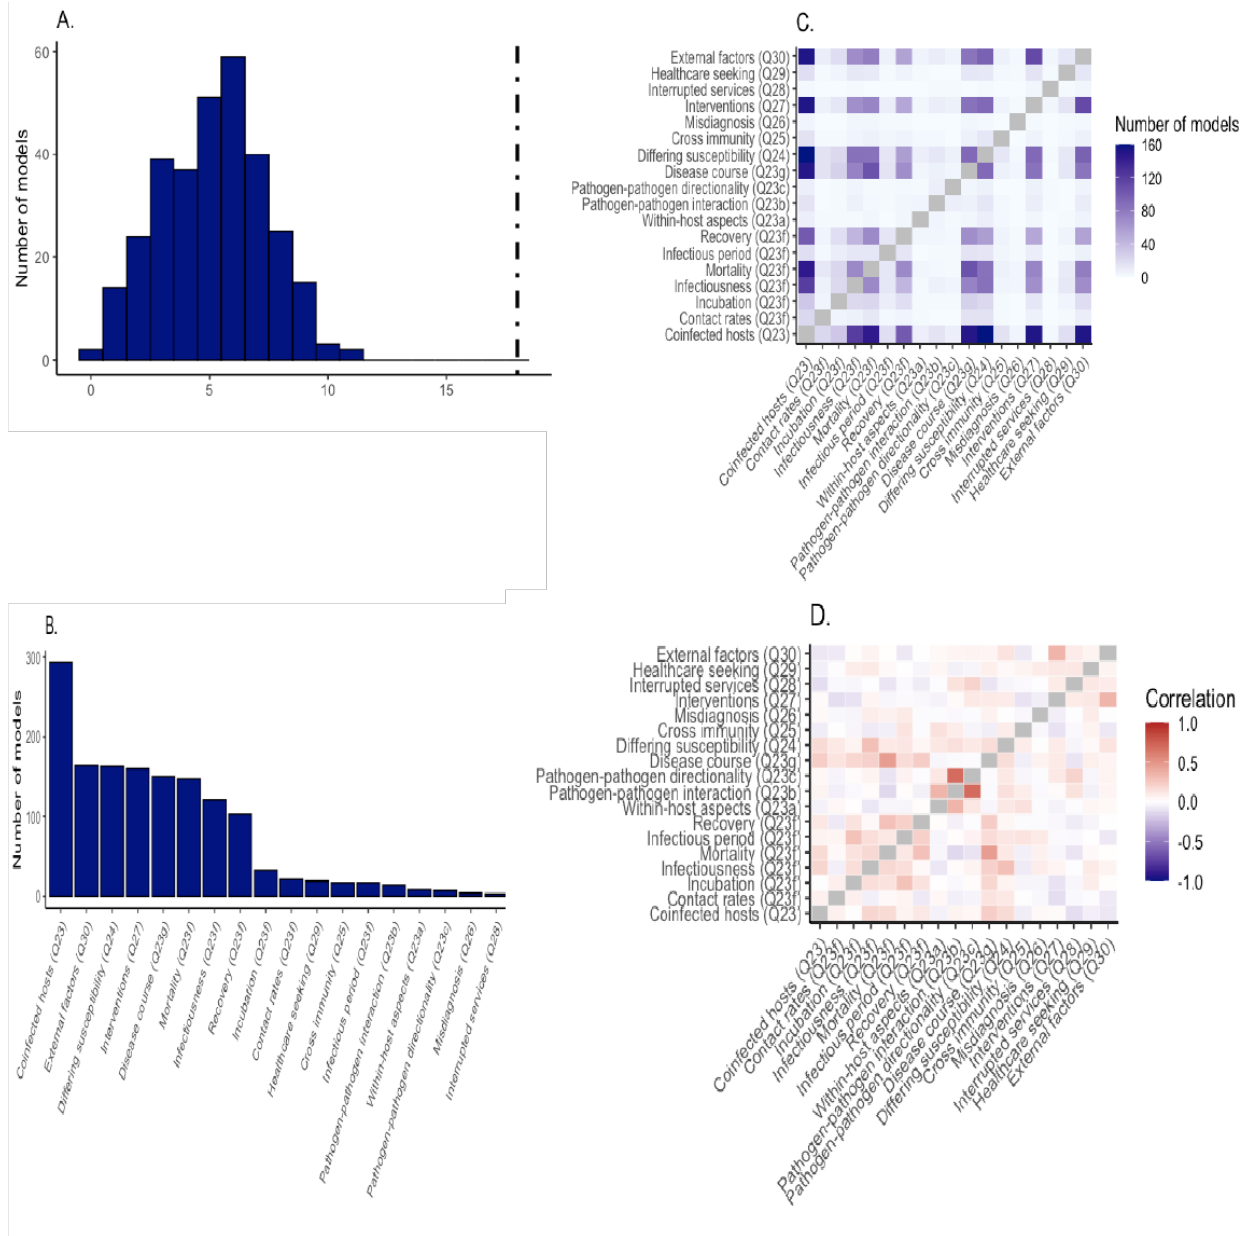

448  
 449 **Figure 6.** Measures of model complexity. We calculated a complexity index, in which a model  
 450 received one point for each aspect that increased model complexity in comparison to a single-  
 451 pathogen model. A) The frequency of complexity scores in our data set; black line represents the  
 452 maximum possible score of 18. Mid-range scores between 4 and 7 were most common. B) The  
 453 frequency of each complexity component in our data set. C) The co-occurrence of different  
 454 complexity components within the same model. The inclusion of coinfecting hosts and external  
 455 interventions, in particular interventions, was very common in our data set. D) The correlation  
 456 coefficients for each pair of complexity components. Question 23d was not answered for any  
 457 models in our data set and thus was omitted from panels C and D.

458  
 459 **4. Discussion**  
 460



461 Pathogens do not exist in a vacuum; they are part of a complex ecosystem that, among other  
462 players, contains multiple pathogens that often vie for the same pool of susceptible hosts and can  
463 be influenced by the same external factors, such as climate and vector abundance. Mathematical  
464 models that explicitly explore the dynamics of co-circulating pathogens have the potential to  
465 inform numerous open questions in disease ecology and public health. In our systematic review  
466 of co-circulating pathogen models, we found that the scope of the literature in this field has  
467 gradually expanded over the past three decades. The emergence of HIV and the clear connection  
468 between HIV infection and increased susceptibility to other pathogens was a major catalyzing  
469 event for this area of work. However, even as models of multiple pathogens have become more  
470 common, there are still extensions of these models that remain underexplored, such as tying  
471 within-host processes to population-level models, exploring the effects of misdiagnosis of  
472 clinically similar diseases, and assessing the impacts of changes in resource allocation during  
473 outbreaks.

474

#### 475 *4.1 Model complexity*

476

477 We created a complexity index to capture the extent to which a co-circulating pathogen model  
478 diverged from a simple, single-pathogen model, and found that the majority of models in our  
479 review fell into a middle range of this index. The inclusion of a second pathogen in the model  
480 often necessitated a few key additional parameters to capture the known biological interactions  
481 between the two pathogens, but a full range of model enhancements was rarely deployed. For  
482 example, including HIV and TB in the same model necessitates that the model structure account  
483 for susceptibility to TB in HIV-infected hosts. Other interactions between the two pathogens  
484 were also commonly included including higher likelihood of TB reactivation from the latent  
485 phase in HIV-infected individuals and increased morbidity and mortality in HIV-TB co-infecteds.  
486 Far less common in our data set was the inclusion of external factors that reflect the ways in  
487 which our health systems interface with the world of co-circulating pathogens and their hosts.  
488 For example, arboviruses such as dengue, chikungunya, and Zika can present with similar  
489 clinical symptoms, which can lead to misdiagnosis of one infection for one another (Silva et al.  
490 2019). Misdiagnoses can then result in spurious surveillance data from which we build our  
491 models (Oliveira et al. 2020), and potentially mis-appropriated public health funds targeted to  
492 prevent one disease at the expense of the others. Another topic that came hurtling to the  
493 foreground with the COVID-19 pandemic is the potential of one emerging pathogen to interrupt  
494 and delay healthcare services targeted towards the treatment and prevention of other pathogens  
495 (Bigouette et al. 2022). During the COVID-19 response, routine vaccination and surveillance  
496 programs for endemic diseases were put on hold in many nations, with negative consequences,  
497 especially for children (Menendez et al. 2020, Cardoso Pinto et al. 2022).

498

#### 499 *4.2 A new framework for model development*

500

501 Model structure complexity often appeared to be driven by the authors' scholarly motivation(s)  
502 for creating the model. Our analysis of author's motivations resulted in binning papers into four  
503 meta-categories: (i) understanding the dynamics of co-circulating pathogens, (ii) developing  
504 novel mathematical models, (iii) implementing intervention or control measures, and (iv)  
505 calculating cost-effectiveness and optimal control of interventions. As an overarching schema to  
506 approach the current state of the field, we propose that papers in categories (i) and (ii) be

507 classified under an umbrella of “**exploration**” and those in (iii) and (iv) as “**evaluation.**” This  
508 overarching classification provides a convenient framework to be used for both viewing the  
509 current state of the literature and evaluating where knowledge gaps remain. Many of the papers  
510 focused on **exploration** had a primarily mathematical goal to simply develop a compartmental  
511 model of two co-circulating pathogens (Lusiana et al. 2017, Jose et al. 2023), but some extended  
512 into testing more fundamental hypotheses, such as why two co-circulating pathogens can co-  
513 exist in some regions and not others (Amaku et al. 2011), or how asymmetric cross-immunity  
514 between related pathogens observed in laboratory studies may impact population-level  
515 transmission and prevalence (Restif et al. 2008). Notable examples of **evaluation** included  
516 exploring the tradeoff between decreased population-level transmission of tuberculosis with  
517 extended drug therapy regimens vs. the selective pressure for drug-resistant strains (Kunkel et al.  
518 2016), and examining the impact that a lack of interventions due to health services disruptions  
519 from the COVID-19 pandemic had on diseases such as HIV, malaria, and tuberculosis (Hogan et  
520 al. 2020). Overall, this framework of exploration and evaluation can be useful for researchers to  
521 take stock of the current state of knowledge in their system and identify critical knowledge gaps  
522 to push the field forward.

#### 523 524 *4.3 Model quality*

525 Despite the number of yet unexplored avenues in the field of co-circulating pathogens left to  
526 pursue, in our review we noted that there was a glut of papers with very similar features that  
527 perhaps represent a saturation of this corner of the field. Specifically, 40.8% (127/311) of papers  
528 included two pathogens and had near-identical results sections that calculated the disease-free  
529 equilibria in the model, the basic reproduction number, and performed one or two simple  
530 numerical simulations of host prevalence. These same models often fully lacked any data to  
531 inform the model (25.2%, 32/127), or used recycled parameters from the literature (72.4%,  
532 92/127). Although there is value in such mathematical approaches, each additional study that  
533 performs these steps on a nearly identical system makes only a very incremental contribution to  
534 the body of knowledge of co-circulating pathogen dynamics.

535  
536 Another quality issue we frequently noted was the misunderstanding and/or mischaracterizing of  
537 known biology in the construction of some models. Concrete examples included misalignment of  
538 stated model goals with reported model outcomes. For example, multiple papers stated in the  
539 introduction section that a goal of the model was to explore how HIV-related changes in host  
540 susceptibility to other pathogens may change population trends, but then nothing in the structure  
541 of the model reflected a change in host susceptibility. Similarly, authors would often expound on  
542 the importance of specific host cohorts in transmission, such as men who have sex with men or  
543 intravenous drug users, but then only explicitly include heterosexual sexual encounters in their  
544 contact process represented in the model. These overlooked errors in the pairing of model  
545 structure to known biology are worrisome in a peer-reviewed system. In addition to both authors  
546 and reviewers devoting more attention to detail, these errors suggest a need for greater emphasis  
547 on the correspondence between model structure and stated biological assumptions in training  
548 around mathematical modeling of infectious disease dynamics.

#### 549 550 *4.4 Future directions: Multi-scale, multi-pathogen models*

551

552 Much of the complexity of disease dynamics arises from interactions across scales of biological  
553 organization; from within hosts to the population level, and from the population to the greater  
554 ecological community, disease dynamics occur across orders of magnitude. As the field of  
555 modeling co-circulating pathogens continues to grow and evolve, the effects of scale in modeling  
556 studies cannot be minimized. New studies are needed that examine multi-scale interactions and  
557 impacts of multiple pathogens in a single model. Consider, for example, the known effect of  
558 influenza on respiratory immune defenses, leading to a greater likelihood of infection by  
559 bacterial pathogens such as *Streptococcus pneumoniae* and also potentially worse clinical  
560 outcomes (Herrera et al. 2016). While a few papers in our data set did make simple adjustments  
561 to the model to include aspects such as changes in host susceptibility due to infection, very few  
562 contained a true within-host model where the processes at play within the host had the potential  
563 to influence population-level transmission in a nuanced or mechanistic manner. Work that  
564 connects the known within-host, cellular-level impacts of pathogen-pathogen interactions  
565 (McCullers 2006) to population-level prevalence and disease burden could give insight into  
566 better surveillance tactics and treatment schemes to mitigate the negative impacts of these  
567 pathogens. Key to this pursuit are appropriate data sources at multiple scales, from the individual  
568 to the population level, to verify how pathogens are interacting within hosts and tie these data to  
569 phenomena observed with co-circulating pathogen transmission at the population level. For  
570 respiratory pathogens, the COVID-19 pandemic and the accompanying “triple-demic” of  
571 COVID-19, influenza, and RSV has, at least temporarily, heightened testing and surveillance and  
572 expanded the use of excellent tools such as wastewater data (Boehm et al. 2023, Luo et al. 2023,  
573 Petros et al. 2024). We hope for a continued focus on gathering high-quality data for these and  
574 other pathogens, which will allow researchers to build robust, data-informed models that can  
575 directly inform public health efforts.

#### 576 577 *4.5 Study limitations*

578  
579 It is important to emphasize that we restricted our review to include only models that contained a  
580 mechanistic representation of co-circulating pathogens of humans. This criterion allowed for an  
581 in-depth focus on this subset of the literature, but we recognize that there are still many insights  
582 to be found from non-mechanistic statistical and geospatial approaches, models of theoretical  
583 pathogens, and work done in animal and plant systems. Work on theoretical pathogens can  
584 explore central mechanisms that drive the patterns seen in co-circulating pathogens in human  
585 populations, such as how co-infection may (or may not) drive changes in pathogen virulence  
586 (Brown et al. 2002). Experimental manipulations in non-human systems that would not be  
587 feasible or ethical with human subjects can also yield fundamental insights into the interactions  
588 and mechanisms at play in a multi-pathogen world, such as how variability in infection risk can  
589 be more strongly influenced by co-infecting pathogens than other mechanisms such as host  
590 exposure to parasites and host body condition (Telfer et al. 2010). These examples highlight the  
591 depth of investigation that is possible in other host-pathogen systems, and we want to emphasize  
592 that despite the focus of this systematic review, the power of non-human studies to inform and  
593 inspire work on human pathogens should not be discounted. A tandem review of co-circulating  
594 pathogen models that did not meet our inclusion criteria, such as non-mechanistic models and  
595 those focused on non-human pathogens, could help further inform and advance approaches  
596 across systems.

597

598 *4.6 Conclusion*

599

600 Co-circulating pathogen models can be a highly useful tool in the public health toolkit when it  
601 comes to preventing and mitigating infectious disease. From the papers in our review, we found  
602 clear examples of concrete recommendations that arise from considering co-circulating  
603 pathogens, ranging from actionable recommendations based on a realistic public health budget  
604 (Goyal and Murray 2017) to screening recommendations to meet WHO targets for a particular  
605 disease (Macgregor et al. 2020). We believe many more insights remain to be discovered from  
606 future work on co-circulating pathogens. What level of surveillance is needed to track and  
607 forecast a pathogen of interest when it co-circulates with other pathogens that cause similar  
608 clinical symptoms, such as arboviruses? What testing and treatment regimens can minimize the  
609 population-level effects of co-circulating respiratory pathogens that are known to have within-  
610 host interactions? How might antibacterial treatment for one pathogen influence the trajectory of  
611 antibiotic resistance not just in the concerned species, but other co-circulating bacteria? We hope  
612 that this systematic review serves as a launching point for others to identify and tackle the most  
613 exciting and pressing challenges presented by co-circulating pathogens, and in doing so mitigate  
614 the burden of infectious diseases.

615

616

617

618 **References**

- 619 Abu-Raddad, L. J., L. Sabatelli, J. T. Achterberg, J. D. Sugimoto, I. M. Longini, C. Dye, and M.  
620 E. Halloran. 2009. Epidemiological benefits of more-effective tuberculosis vaccines,  
621 drugs, and diagnostics. *Proceedings of the National Academy of Sciences*  
622 106:13980–13985.
- 623 Alemu, A., Y. Shiferaw, Z. Addis, B. Mathewos, and W. Birhan. 2013. Effect of malaria on  
624 HIV/AIDS transmission and progression. *Parasites & Vectors* 6:18.
- 625 Amaku, M., F. A. B. Coutinho, and E. Massad. 2011. Why dengue and yellow fever coexist in  
626 some areas of the world and not in others? *Biosystems* 106:111–120.
- 627 Aria, M., T. Le, C. Cuccurullo, A. Belfiore, and J. Choe. 2024. openalexR: An R-Tool for  
628 Collecting Bibliometric Data from OpenAlex. *The R Journal* 15:167–180.
- 629 Bigouette, J. P., A. W. Callaghan, M. Donadel, A. M. Porter, L. Rosencrans, J. S. Lickness, S.  
630 Blough, X. Li, R. T. Perry, A. J. Williams, H. M. Scobie, B. A. Dahl, J. McFarland, and C.  
631 S. Murrill. 2022. Effects of COVID-19 on Vaccine-Preventable Disease Surveillance  
632 Systems in the World Health Organization African Region, 2020. *Emerging Infectious*  
633 *Diseases* 28.
- 634 Boehm, A. B., M. K. Wolfe, B. J. White, B. Hughes, D. Duong, and A. Bidwell. 2023. More  
635 than a Triple endemic: Influenza A Virus, Respiratory Syncytial Virus, SARS-CoV-2, and  
636 Human Metapneumovirus in Wastewater during Winter 2022–2023. *Environmental*  
637 *Science & Technology Letters* 10:622–627.
- 638 Bonyah, E., M. A. Khan, K. O. Okosun, and J. F. Gómez-Aguilar. 2019. On the co-infection of  
639 dengue fever and Zika virus. *Optimal Control Applications and Methods* 40:394–421.

640 Brooks, M. E., K. Kristensen, K. J. Van Benthem, A. Magnusson, C. W. Berg, A. Nielsen, H. J.  
641 Skaug, M. Machler, and B. M. Bolker. 2017. glmmTMB balances speed and flexibility  
642 among packages for zero-inflated generalized linear mixed modeling. *The R journal*  
643 9:378–400.

644 Brown, S. P., M. E. Hochberg, and B. T. Grenfell. 2002. Does multiple infection select for  
645 raised virulence? *Trends in Microbiology* 10:401–405.

646 Cardoso Pinto, A. M., L. Ranasinghe, P. J. Dodd, S. S. Budhathoki, J. A. Seddon, and E.  
647 Whittaker. 2022. Disruptions to routine childhood vaccinations in low- and middle-  
648 income countries during the COVID-19 pandemic: A systematic review. *Frontiers in*  
649 *Pediatrics* 10:979769.

650 ChatGPT. 2024, April 1. . OpenAI.

651 Cowger, T. L., E. J. Murray, J. Clarke, M. T. Bassett, B. O. Ojikutu, S. M. Sánchez, N. Linos,  
652 and K. T. Hall. 2022. Lifting Universal Masking in Schools — Covid-19 Incidence  
653 among Students and Staff. *New England Journal of Medicine* 387:1935–1946.

654 Da Silva Pessoa Vieira, C. J., C. Steiner São Bernardo, D. J. Ferreira Da Silva, J. Rigotti  
655 Kubiszeski, E. Serpa Barreto, H. A. De Oliveira Monteiro, G. R. Canale, C. A. Peres, A.  
656 L. Massey, T. Levi, and R. Vieira De Moraes Bronzoni. 2022. Land-use effects on  
657 mosquito biodiversity and potential arbovirus emergence in the Southern Amazon,  
658 Brazil. *Transboundary and Emerging Diseases* 69:1770–1781.

659 Eikenberry, S. E., and A. B. Gumel. 2018. Mathematical modeling of climate change and  
660 malaria transmission dynamics: a historical review. *Journal of Mathematical Biology*  
661 77:857–933.

662 Ferguson, N. M., D. A. T. Cummings, C. Fraser, J. C. Cajka, P. C. Cooley, and D. S. Burke.  
663 2006. Strategies for mitigating an influenza pandemic. *Nature* 442:448–452.

664 Galvin, S. R., and M. S. Cohen. 2004. The role of sexually transmitted diseases in HIV  
665 transmission. *Nature Reviews Microbiology* 2:33–42.

666 Gaythorpe, K. A., K. Abbas, J. Huber, A. Karachaliou, N. Thakkar, K. Woodruff, X. Li, S.  
667 Echeverria-Londono, VIMC Working Group on COVID-19 Impact on Vaccine  
668 Preventable Disease, A. Arsene Bitu Fouda, F. Cutts, E. Dansereau, A. Durupt, U.  
669 Griffiths, J. Horton, L. K. Krause, K. Kretsinger, T. Mengistu, I. Mirza, S. R. Procter, S.  
670 Shendale, M. Ferrari, M. L. Jackson, K. McCarthy, T. A. Perkins, C. Trotter, and M. Jit.  
671 2021. Impact of COVID-19-related disruptions to measles, meningococcal A, and  
672 yellow fever vaccination in 10 countries. *eLife* 10:e67023.

673 Goyal, A., and J. M. Murray. 2017. Roadmap to control HBV and HDV epidemics in China.  
674 *Journal of Theoretical Biology* 423:41–52.

675 Heesterbeek, H., R. M. Anderson, V. Andreasen, S. Bansal, D. De Angelis, C. Dye, K. T. D.  
676 Eames, W. J. Edmunds, S. D. W. Frost, S. Funk, T. D. Hollingsworth, T. House, V.  
677 Isham, P. Klepac, J. Lessler, J. O. Lloyd-Smith, C. J. E. Metcalf, D. Mollison, L. Pellis, J.  
678 R. C. Pulliam, M. G. Roberts, C. Viboud, and Isaac Newton Institute IDD  
679 Collaboration. 2015. Modeling infectious disease dynamics in the complex  
680 landscape of global health. *Science* 347:aaa4339.

681 Herrera, A. L., V. C. Huber, and M. S. Chaussee. 2016. The Association between Invasive  
682 Group A Streptococcal Diseases and Viral Respiratory Tract Infections. *Frontiers in*  
683 *Microbiology* 7.

684 Hogan, A. B., B. L. Jewell, E. Sherrard-Smith, J. F. Vesga, O. J. Watson, C. Whittaker, A.  
685 Hamlet, J. A. Smith, P. Winskill, R. Verity, M. Baguelin, J. A. Lees, L. K. Whittles, K. E.  
686 C. Ainslie, S. Bhatt, A. Boonyasiri, N. F. Brazeau, L. Cattarino, L. V. Cooper, H.  
687 Coupland, G. Cuomo-Dannenburg, A. Dighe, B. A. Djaafara, C. A. Donnelly, J. W.  
688 Eaton, S. L. Van Elsland, R. G. FitzJohn, H. Fu, K. A. M. Gaythorpe, W. Green, D. J.  
689 Haw, S. Hayes, W. Hinsley, N. Imai, D. J. Laydon, T. D. Mangal, T. A. Mellan, S. Mishra,  
690 G. Nedjati-Gilani, K. V. Parag, H. A. Thompson, H. J. T. Unwin, M. A. C. Vollmer, C. E.  
691 Walters, H. Wang, Y. Wang, X. Xi, N. M. Ferguson, L. C. Okell, T. S. Churcher, N.  
692 Arinaminpathy, A. C. Ghani, P. G. T. Walker, and T. B. Hallett. 2020. Potential impact  
693 of the COVID-19 pandemic on HIV, tuberculosis, and malaria in low-income and  
694 middle-income countries: a modelling study. *The Lancet Global Health* 8:e1132–  
695 e1141.

696 Huang, Y., and P. Rohani. 2006. Age-structured effects and disease interference in  
697 childhood infections. *Proceedings of the Royal Society B: Biological Sciences*  
698 273:1229–1237.

699 Isea, R., and K. Lonngren. 2016. A Preliminary Mathematical Model for the Dynamic  
700 Transmission of Dengue, Chikungunya and Zika. *American Journal of Modern*  
701 *Physics and Application* 3:11–15.

702 Jenness, S. M., K. M. Weiss, S. M. Goodreau, T. Gift, H. Chesson, K. W. Hoover, D. K. Smith,  
703 A. Y. Liu, P. S. Sullivan, and E. S. Rosenberg. 2017. Incidence of Gonorrhoea and  
704 Chlamydia Following Human Immunodeficiency Virus Preexposure Prophylaxis



- 705           Among Men Who Have Sex With Men: A Modeling Study. *Clinical Infectious*  
706           Diseases 65:712–718.
- 707   Johnson, L. F., R. E. Dorrington, D. Bradshaw, and D. J. Coetzee. 2011. The effect of  
708           syndromic management interventions on the prevalence of sexually transmitted  
709           infections in South Africa. *Sexual & Reproductive Healthcare* 2:13–20.
- 710   Jose, S. A., R. Raja, B. I. Omede, R. P. Agarwal, J. Alzabut, J. Cao, and V. E. Balas. 2023.  
711           Mathematical modeling on co-infection: transmission dynamics of Zika virus and  
712           Dengue fever. *Nonlinear Dynamics* 111:4879–4914.
- 713   Kate K Orroth, Esther E Freeman, Roel Bakker, Anne Buvé, Judith R Glynn, Marie-Claude  
714           Boily, Richard G White, J Dik F Habbema, and Richard J Hayes. 2007. Understanding  
715           the differences between contrasting HIV epidemics in east and west Africa: results  
716           from a simulation model of the Four Cities Study. *Sexually Transmitted Infections*  
717           83:i5.
- 718   Korenromp, E. L., R. G. White, K. K. Orroth, R. Bakker, A. Kamali, D. Serwadda, R. H. Gray, H.  
719           Grosskurth, J. D. F. Habbema, and R. J. Hayes. 2005. Determinants of the Impact of  
720           Sexually Transmitted Infection Treatment on Prevention of HIV Infection: A Synthesis  
721           of Evidence from the Mwanza, Rakai, and Masaka Intervention Trials. *The Journal of*  
722           Infectious Diseases 191:S168–S178.
- 723   Kunkel, A., F. W. Crawford, J. Shepherd, and T. Cohen. 2016. Benefits of continuous  
724           isoniazid preventive therapy may outweigh resistance risks in a declining  
725           tuberculosis/HIV coepidemic. *AIDS* 30:2715–2723.

- 726 Lafferty, K. D. 2009. The ecology of climate change and infectious diseases. *Ecology*  
727 90:888–900.
- 728 Lemaitre, J., D. Pasetto, J. Perez-Saez, C. Sciarra, J. F. Wamala, and A. Rinaldo. 2019.  
729 Rainfall as a driver of epidemic cholera: Comparative model assessments of the  
730 effect of intra-seasonal precipitation events. *Acta Tropica* 190:235–243.
- 731 Lloyd-Smith, J. O., M. Poss, and B. T. Grenfell. 2008. HIV-1/parasite co-infection and the  
732 emergence of new parasite strains. *Parasitology* 135:795–806.
- 733 Luo, W., Q. Liu, Y. Zhou, Y. Ran, Z. Liu, W. Hou, S. Pei, and S. Lai. 2023. Spatiotemporal  
734 variations of “triple-demic” outbreaks of respiratory infections in the United States  
735 in the post-COVID-19 era. *BMC Public Health* 23:2452.
- 736 Lusiana, V., P. S. Putra, N. Nuraini, and E. Soewono. 2017. Mathematical modeling of  
737 transmission co-infection tuberculosis in HIV community. Page 020012. Makassar,  
738 Indonesia.
- 739 Macgregor, L., M. Desai, N. K. Martin, J. Nicholls, F. Hickson, P. Weatherburn, M. Hickman,  
740 and P. Vickerman. 2020. Scaling up screening and treatment for elimination of  
741 hepatitis C among men who have sex with men in the era of HIV pre-exposure  
742 prophylaxis. *EClinicalMedicine* 19:100217.
- 743 Marimuthu, Y., B. Nagappa, N. Sharma, S. Basu, and K. K. Chopra. 2020. COVID-19 and  
744 tuberculosis: A mathematical model based forecasting in Delhi, India. *Indian*  
745 *Journal of Tuberculosis* 67:177–181.

- 746 Mayer, K. H., C. L. Karp, P. G. Auwaerter, and K. H. Mayer. 2007. Coinfection with HIV and  
747 Tropical Infectious Diseases. I. Protozoal Pathogens. *Clinical Infectious Diseases*  
748 45:1208–1213.
- 749 McCullers, J. A. 2006. Insights into the Interaction between Influenza Virus and  
750 *Pneumococcus*. *Clinical Microbiology Reviews* 19:571–582.
- 751 Mendenhall, E., B. A. Kohrt, C. H. Logie, and A. C. Tsai. 2022. Syndemics and clinical  
752 science. *Nature Medicine* 28:1359–1362.
- 753 Menendez, C., R. Gonzalez, F. Donnay, and R. G. F. Leke. 2020. Avoiding indirect effects of  
754 COVID-19 on maternal and child health. *The Lancet Global Health* 8:e863–e864.
- 755 Montales, M. T., A. Chaudhury, A. Beebe, S. Patil, and N. Patil. 2015. HIV-Associated TB  
756 Syndemic: A Growing Clinical Challenge Worldwide. *Frontiers in Public Health* 3.
- 757 Mordecai, E. A., J. M. Caldwell, M. K. Grossman, C. A. Lippi, L. R. Johnson, M. Neira, J. R.  
758 Rohr, S. J. Ryan, V. Savage, M. S. Shocket, R. Sippy, A. M. Stewart Ibarra, M. B.  
759 Thomas, and O. Villena. 2019. Thermal biology of mosquito-borne disease. *Ecology*  
760 *Letters* 22:1690–1708.
- 761 Oidtman, R. J., G. España, and T. A. Perkins. 2021. Co-circulation and misdiagnosis led to  
762 underestimation of the 2015–2017 Zika epidemic in the Americas. *PLOS Neglected*  
763 *Tropical Diseases* 15:e0009208.
- 764 Okuneye, K. O., J. X. VELASCO-HERNANDEZ, and A. B. GUMEL. 2017. The “Unholy”  
765 Chikungunya-Dengue-Zika Trinity: A Theoretical Analysis. *Journal of Biological*  
766 *Systems* 25:545–585.

- 767 Oliveira, J. F., M. S. Rodrigues, L. M. Skalinski, A. E. S. Santos, L. C. Costa, L. L. Cardim, E. S.  
768 Paixão, M. D. C. N. Costa, W. K. Oliveira, M. L. Barreto, M. G. Teixeira, and R. F. S.  
769 Andrade. 2020. Interdependence between confirmed and discarded cases of  
770 dengue, chikungunya and Zika viruses in Brazil: A multivariate time-series analysis.  
771 PLOS ONE 15:e0228347.
- 772 Pagel, C., and C. A. Yates. 2022. Role of mathematical modelling in future pandemic  
773 response policy. BMJ:e070615.
- 774 Petros, B. A., C. E. Milliren, P. C. Sabeti, and A. Ozonoff. 2024. Increased Pediatric  
775 Respiratory Syncytial Virus Case Counts Following the Emergence of Severe Acute  
776 Respiratory Syndrome Coronavirus 2 Can Be Attributed to Changes in Testing.  
777 Clinical Infectious Diseases:ciae140.
- 778 R Core Team. 2021. R: A language and environment for statistical computing. R Foundation  
779 for Statistical Computing, Vienna, Austria.
- 780 Rao, D. W., C. J. Bayer, G. Liu, A. Chikandiwa, M. Sharma, C. L. Hathaway, N. Tan, N. Mugo,  
781 and R. V. Barnabas. 2022. Modelling cervical cancer elimination using single-visit  
782 screening and treatment strategies in the context of high HIV prevalence: estimates  
783 for KwaZulu-Natal, South Africa. Journal of the International AIDS Society  
784 25:e26021.
- 785 Restif, O., D. N. Wolfe, E. M. Goebel, O. N. Bjornstad, and E. T. Harvill. 2008. Of mice and  
786 men: asymmetric interactions between Bordetella pathogen species. Parasitology  
787 135:1517–1529.

- 788 Ribas Freitas, A. R., A. A. Pinheiro Chagas, A. M. Siqueira, and L. Pamplona De Góes  
789 Cavalcanti. 2024. How much of the current serious arbovirus epidemic in Brazil is  
790 dengue and how much is chikungunya? *The Lancet Regional Health - Americas*  
791 34:100753.
- 792 Richard Orr, Heather Piwowar, Jason Priem. 2024. Unpaywall. OurResearch.
- 793 Rohani, P., C. J. Green, N. B. Mantilla-Beniers, and B. T. Grenfell. 2003. Ecological  
794 interference between fatal diseases. *Nature* 422:885–888.
- 795 Silva, M. M. O., L. B. Tauro, M. Kikuti, R. O. Anjos, V. C. Santos, T. S. F. Gonçalves, I. A. D.  
796 Paploski, P. S. S. Moreira, L. C. J. Nascimento, G. S. Campos, A. I. Ko, S. C. Weaver,  
797 M. G. Reis, U. Kitron, and G. S. Ribeiro. 2019. Concomitant Transmission of Dengue,  
798 Chikungunya, and Zika Viruses in Brazil: Clinical and Epidemiological Findings From  
799 Surveillance for Acute Febrile Illness. *Clinical Infectious Diseases* 69:1353–1359.
- 800 Telfer, S., X. Lambin, R. Birtles, P. Beldomenico, S. Burthe, S. Paterson, and M. Begon. 2010.  
801 Species Interactions in a Parasite Community Drive Infection Risk in a Wildlife  
802 Population. *Science* 330:243–246.
- 803 Thomson, M. C., F. J. Doblas-Reyes, S. J. Mason, R. Hagedorn, S. J. Connor, T. Phindela, A. P.  
804 Morse, and T. N. Palmer. 2006. Malaria early warnings based on seasonal climate  
805 forecasts from multi-model ensembles. *Nature* 439:576–579.
- 806 Tsai, A. C., E. Mendenhall, J. A. Trostle, and I. Kawachi. 2017. Co-occurring epidemics,  
807 syndemics, and population health. *The Lancet* 389:978–982.

808 Vickerman, P., N. K. Martin, and M. Hickman. 2012. Understanding the trends in HIV and  
809 hepatitis C prevalence amongst injecting drug users in different settings—  
810 Implications for intervention impact. *Drug and Alcohol Dependence* 123:122–131.

811 Vitoria, M., R. Granich, C. F. Gilks, C. Gunneberg, M. Hosseini, W. Were, M. Raviglione, and  
812 K. M. De Cock. 2009. The Global Fight Against HIV/AIDS, Tuberculosis, and Malaria.  
813 *American Journal of Clinical Pathology* 131:844–848.

814 de Vos, A. S., J. J. van der Helm, M. Prins, and M. E. Kretzschmar. 2012. Determinants of  
815 persistent spread of HIV in HCV-infected populations of injecting drug users.  
816 *Epidemics* 4:57–67.

817 Web of Science API. 2024. . Clarivate.

818 Zahouli, J. B. Z., B. G. Koudou, P. Müller, D. Malone, Y. Tano, and J. Utzinger. 2017. Effect of  
819 land-use changes on the abundance, distribution, and host-seeking behavior of  
820 *Aedes arbovirus* vectors in oil palm-dominated landscapes, southeastern Côte  
821 d’Ivoire. *PLOS ONE* 12:e0189082.

822 Zelenev, A., J. Li, A. Mazhnaya, S. Basu, and F. L. Altice. 2018. Hepatitis C virus treatment as  
823 prevention in an extended network of people who inject drugs in the USA: a  
824 modelling study. *The Lancet Infectious Diseases* 18:215–224.

825  
826

827 **Supplemental: Co-circulating pathogens of humans: A systematic review of mechanistic**

828 **transmission models**

829

830 **Table of contents:**

831 • Figure S1

832 • Figure S2

833 • Table S1

834 • Table S2

835

836

837

838

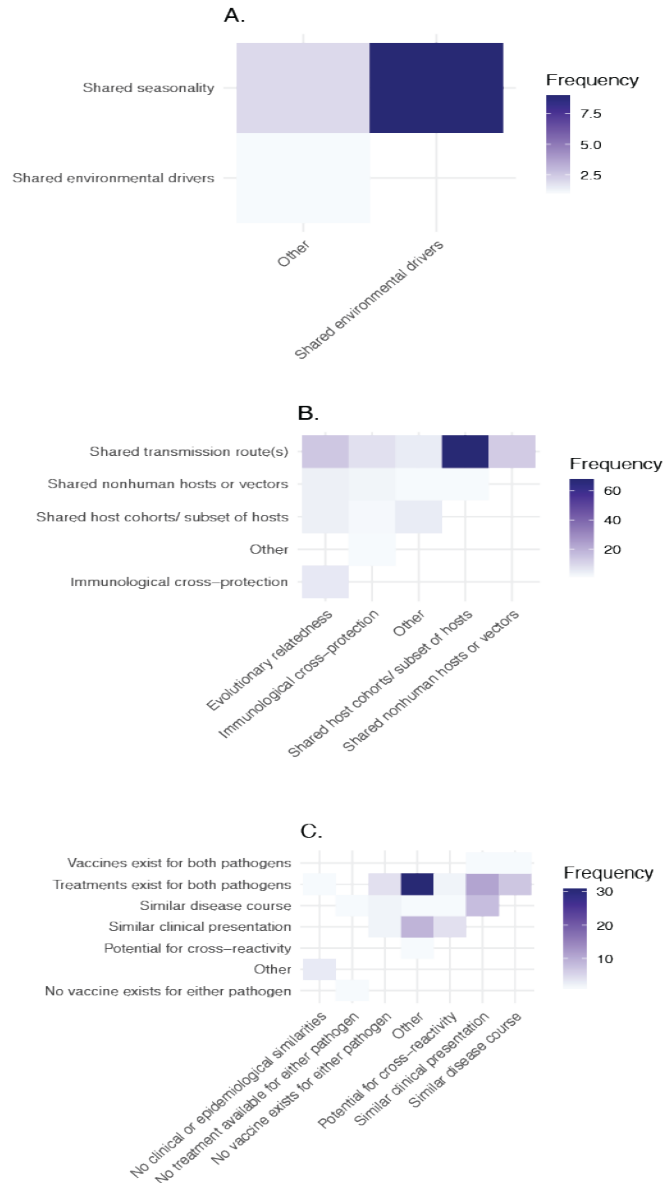

839  
840 **Figure S1.** The co-occurrence of different environmental similarities (A), biological similarities  
841 (B), or clinical/epidemiological similarities (C) noted between pathogens in the same model



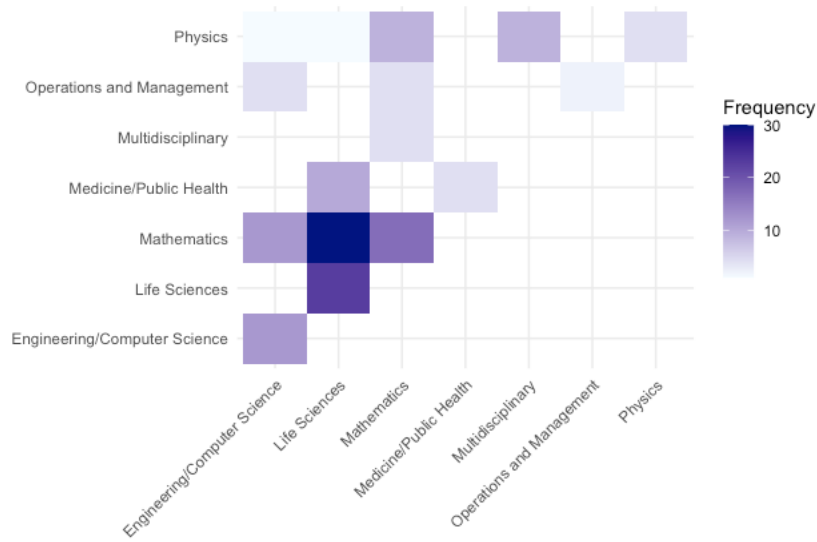

842  
843 **Figure S2.** Overlapping classifications of journal types for the journals represented by papers in  
844 our data set.

845  
846  
847  
848  
849  
850  
851  
852  
853  
854  
855  
856  
857  
858  
859  
860  
861  
862  
863  
864  
865  
866  
867  
868  
869  
870  
871

872 **Table S1.** An example calculation of the complexity index. This calculation was made for one  
 873 paper in our data set, “On the co-infection of dengue fever and Zika virus” (Bonyah et al. 2019).

| Question                                                                                                                                                                                                                                                                                                                                                                                      | Response                                             | Index points |
|-----------------------------------------------------------------------------------------------------------------------------------------------------------------------------------------------------------------------------------------------------------------------------------------------------------------------------------------------------------------------------------------------|------------------------------------------------------|--------------|
| <b>Q23.</b> Does the model structure include hosts that are co-infected with two or more pathogens?                                                                                                                                                                                                                                                                                           | Yes                                                  | 1            |
| <b>Q23a.</b> Are any within-host aspects of co-infection explicitly included in the model structure?                                                                                                                                                                                                                                                                                          | No                                                   | 0            |
| <b>Q23b.</b> Does the model structure explicitly include within-host pathogen-pathogen interaction (direct or indirect) in a co-infected host?                                                                                                                                                                                                                                                | No                                                   | 0            |
| <b>Q23c.</b> What type of pathogen-pathogen interaction is represented in the model structure?                                                                                                                                                                                                                                                                                                | No                                                   | 0            |
| <b>Q23f.</b> Which parameter values for the co-infected class are different from the mono-infected and uninfected classes?<br>Check all that apply:<br><ul style="list-style-type: none"> <li>- Contact rates</li> <li>- Incubation period</li> <li>- Infectiousness</li> <li>- Infection-induced mortality</li> <li>- Infectious period</li> <li>- Recovery time</li> <li>- Other</li> </ul> | -Infectiousness<br><br>- Infection-induced mortality | 2            |
| <b>Q23g.</b> Does the model include any separate terms to represent changes in disease symptoms, disease course, or disease severity in co-infected individuals?                                                                                                                                                                                                                              | Yes                                                  | 1            |
| <b>Q24.</b> In the model, do mono-infected and uninfected hosts have different levels of susceptibility to the other pathogens in the model?                                                                                                                                                                                                                                                  | Yes                                                  | 1            |
| <b>Q25.</b> Does the model structure include any representation of cross-immunity between two or more of the pathogens modeled?                                                                                                                                                                                                                                                               | No                                                   | 0            |
| <b>Q26.</b> Does the model structure include something to account for reporting or surveillance errors due to misdiagnosis between the pathogens modeled?                                                                                                                                                                                                                                     | No                                                   | 0            |

|                                                                                                                                                                                     |                                     |          |
|-------------------------------------------------------------------------------------------------------------------------------------------------------------------------------------|-------------------------------------|----------|
| <b>Q27.</b> Does the model structure include anything to account for shared impacts of an intervention?                                                                             | Yes                                 | 1        |
| <b>Q28.</b> Does the model structure include anything to account for interruptions or declines in services offered due to another co-circulating pathogen in the model?             | No                                  | 0        |
| <b>Q29.</b> Does the model structure include changes in health seeking behavior for infection with one pathogen because of something occurring as the result of the other pathogen? | No                                  | 0        |
| <b>Q30.</b> Does the model structure include any other external factors that directly or indirectly affect the transmission of both pathogens?                                      | Yes                                 | 1        |
|                                                                                                                                                                                     | <b>Total Complexity Index Score</b> | <b>7</b> |

874  
875  
876

877  
878  
879

**Table S2.** We binned related Web of Science journal categories into meta categories used for analysis.

| Web of Science Categories                                                                                                                                                                                                                                                                              | Binned category              |
|--------------------------------------------------------------------------------------------------------------------------------------------------------------------------------------------------------------------------------------------------------------------------------------------------------|------------------------------|
| Mathematical and Computational Biology; Mathematics, Applied; Mathematics, Interdisciplinary Applications; Mathematics; Statistics and Probability                                                                                                                                                     | Mathematics                  |
| Computer Science, Interdisciplinary Applications; Computer Science, Software Engineering; Computer Science, Information Systems; Engineering, Electrical and Electronic; Engineering, Chemical; Engineering, Mechanical; Engineering, Multidisciplinary; Automation and Control Systems; Mechanics     | Engineering/Computer Science |
| Management; Operations Research and Management Science                                                                                                                                                                                                                                                 | Operations and Management    |
| Infectious Diseases; Biology; Ecology; Microbiology; Immunology; Parasitology; Tropical Medicine; Virology; Cell Biology; Genetics and Heredity; Environmental Science; Evolutionary Biology; Environmental Sciences; Biophysics; Biotechnology and Applied Microbiology; Biochemical Research Methods | Life Sciences                |
| Gastroenterology and Hepatology; Medicine, General and Internal; Medicine, Research and Experimental; Medicine/Public Health; Substance Abuse; Psychiatry; Public, Environmental and Occupational Health                                                                                               | Medicine/Public Health       |
| Physics, Applied; Physics, Mathematical; Physics, Multidisciplinary                                                                                                                                                                                                                                    | Physics                      |
| Multidisciplinary Sciences; Materials Science, Multidisciplinary                                                                                                                                                                                                                                       | Multidisciplinary            |

880  
881  
882
